# Supplementary material
Source: MDPI journal article supplement (https://www.mdpi.com/2072-4292/5/2/949)
Supplement: s1 [file s1]

Correction

**Correction: Atzberger, C. Advances in Remote Sensing of Agriculture: Context Description, Existing Operational Monitoring Systems and Major Information Needs. *Remote Sens.* 2013, 5, 949–981**

**Clement Atzberger**

Institute for Surveying, Remote Sensing & Land Information (IVFL), University of Natural Resources and Life Sciences, Vienna (BOKU), Peter Jordan Strasse 82, 1190 Vienna, Austria;

E-Mail: clement.atzberger@boku.ac.at; Tel.: +43-1-47654-5101; Fax: +43-1-47654-4529

*Received: 26 July 2013; in revised form: 2 August 2013 / Accepted: 9 August 2013 /*

*Published: 16 August 2013*

---

The author mistakenly spelt Nadine Brisson as Nadine Gobron in the Acknowledgements of [1]. The author would like to correct it as follows:

**Acknowledgments**

I would like to devote this review to my teachers and colleagues, Nadine Brisson and Gilbert Saint, who passed away too early. I am also grateful to a number of people who contributed directly and indirectly to this paper: Antonio Formaggio and Yosio Shimabokuro and their team from INPE (Sao Jose dos Campos) for shared drafting of a related research proposal for a Brazilian monitoring system; Felix Rembold (JRC Ispra) for discussing the original manuscript; Zoltan Balint, Peris Muchiri and SWALIM at FAO Somalia (Nairobi, Kenya) for contributions regarding the CDI drought index; and Anja Klisch, Francesco Vuolo and Matteo Mattiuzzi (BOKU Vienna) for providing inputs related to vegetation phenology and the MODIS processing chain.

The author would like to apologize for any inconvenience this may have caused to the readers.

**Reference**

1. Atzberger, C. Advances in remote sensing of agriculture: Context description, existing operational monitoring systems and major information needs. *Remote Sens.* **2013**, *5*, 949–981.

© 2013 by the authors; licensee MDPI, Basel, Switzerland. This article is an open access article distributed under the terms and conditions of the Creative Commons Attribution license (<http://creativecommons.org/licenses/by/3.0/>).
